# Supplementary material for: A glassy carbon electrode modified with γ-Ce2S3-decorated CNT nanocomposites for uric acid sensor development: a real sample analysis
Source: Royal Society of Chemistry journal article supplement (doi:10.1039/c6ra27414e), 2017-01-01
Supplement: c6ra27414e1.pdf [file c6ra27414e1.pdf]

## Electronic supplemental Information (ESI):

(Ψ) Response time of uric acid detection with  $\text{Ce}_2\text{S}_3$ -CNT NCs/GCE by I-t method.

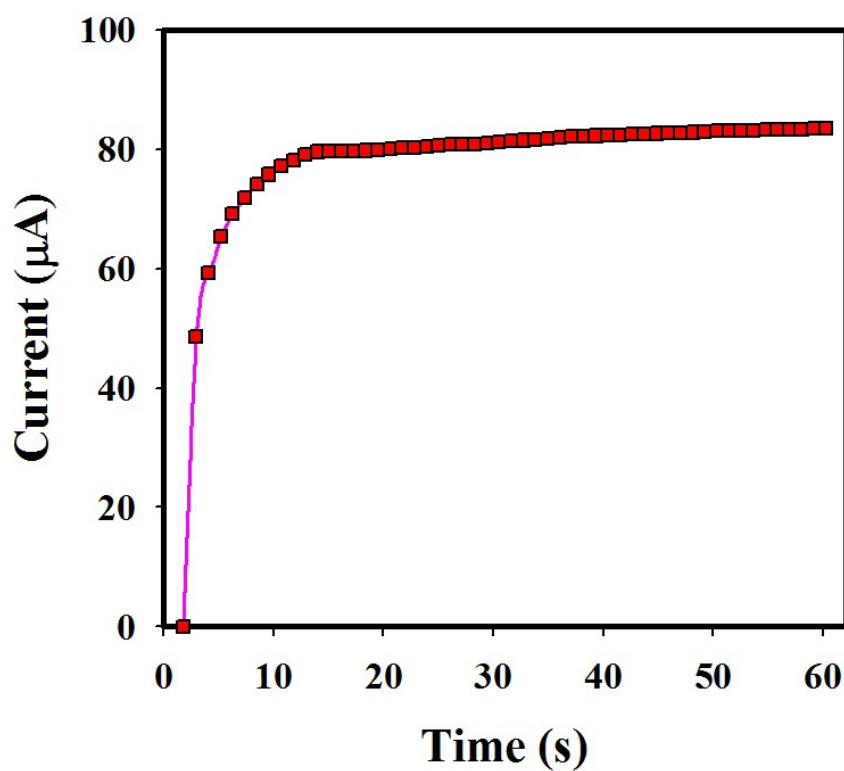

**Fig. S1.** Response time of uric acid detection by  $\text{Ce}_2\text{S}_3$ -CNT NCs/GCE
